1 **embarcadero:**  
2 Species distribution modelling with Bayesian  
3 additive regression trees in R

4 Colin J. Carlson<sup>1,†</sup>

5 <sup>1</sup>*Department of Biology, Georgetown University, Washington, D.C. 20057, USA.*

6 <sup>†</sup>*Correspondence should be directed to [cjc322@georgetown.edu](mailto:cjc322@georgetown.edu).*

7 Submitted to *Methods in Ecology and Evolution* on September 18, 2019

8 **Abstract**

9 1. Classification and regression tree methods, like random forests (RF) or  
10 boosted regression trees (BRT), are one of the most popular methods of  
11 mapping species distributions.

12 2. Bayesian additive regression trees (BARTs) are a relatively new alterna-  
13 tive to other popular regression tree approaches. Whereas BRT iteratively  
14 fits an ensemble of trees each explaining smaller fractions of the total vari-  
15 ance, BART starts by fitting a sum-of-trees model and then uses Bayesian  
16 backfitting with an MCMC algorithm to create a posterior draw. So far,  
17 BARTs have yet to be applied to species distribution modeling.

18 3. **embarcadero** is an R package of convenience tools for researchers in-  
19 terested in species distribution modeling with BARTs. It includes function-  
20 ality for spatial prediction, an automated variable selection and importance  
21 procedure, and other functionality for rapid implementation and data visu-  
22 alization.

23 4. To show how **embarcadero** can be used by ecologists, we re-map the distri-  
24 bution of Crimean-Congo haemorrhagic fever and a likely vector, *Hyalomma*  
25 *truncatum*, in Africa.

26 **Keywords:** Bayesian additive regression trees, species distribution model-  
27 ing, ecological niche modeling, Crimean Congo haemorrhagic fever  
28  
29  
30  
31

## 32 1 Introduction

33 In the last two decades, over a dozen statistical and machine learning methods have  
34 been proposed for species distribution modeling (SDM). Over time, a handful of  
35 methods have risen to predominance due to ease of implementation, computational  
36 speed, and strong predictive performance in rigorous cross-validation. Some meth-  
37 ods are especially popular for specific applications, mostly because of disciplinary  
38 tradition. For example, maximum entropy (MaxEnt) models are widely popular  
39 for studies of global ecological responses to climate change. (VanDerWal *et al.*,  
40 2013; Warren *et al.*, 2013) In disease ecology, boosted regression trees (BRTs) have  
41 become the dominant tool for mapping vectors, reservoirs, and transmission risk of  
42 infectious zoonoses and vector-borne diseases (Carlson *et al.*, 2019; Pigott *et al.*,  
43 2014; Messina *et al.*, 2016), largely due to an influential 2013 paper on dengue  
44 virus. (Bhatt *et al.*, 2013)

45 Boosted regression trees are easily implemented as an out-of-the-box machine  
46 learning method, are powerful for ecological inference, and consistently perform  
47 well in rigorous tests of SDM performance. The classification tree approach is also  
48 more intuitive than the complex fitting procedures “under the hood” of MaxEnt  
49 or Maxlike methods. However, BRTs also have downsides: they can be prone  
50 to overfitting, and fitting procedures are largely handed down as anecdotal best  
51 practices, with most studies choosing learning rates and tree depth based on the de-  
52 fault settings recommended by early work (Elith *et al.*, 2008), with very few studies  
53 selecting parameters from formal cross-validation with packages like `caret`. Fur-  
54 thermore, uncertainty is usually measured by generating an unweighted ensemble  
55 of BRT submodels over subsetted training data, generating a confidence interval  
56 from data permutations rather than formal assumptions about model uncertainty.

57 In this paper, we propose the use of a Bayesian alternative to boosted regression  
58 trees, called *Bayesian additive regression trees* (BARTs), for the problem of species  
59 distribution modeling. In computer science, BARTs are used for everything from  
60 medical diagnostics to self-driving car algorithms (Sparapani *et al.*, 2018; Tan  
61 *et al.*, 2018); however, they have yet to find any widespread application in ecology.  
62 A study from 2011 used BARTs as a tool to examine habitat selection data on  
63 birds (Yen *et al.*, 2011); a 2017 study used BARTs to evaluate performance data of  
64 other species distribution modeling methods. (Farley, 2017) But so far, they have  
65 not been used for the purpose of predicting species distributions. We introduce an  
66 R package, `embarcadero`, as a convenience tool for running SDMs with BARTs.

## 67 **2 Bayesian additive regression trees**

68 Whereas BRTs fit an ensemble of trees each explaining smaller fractions of unex-  
69 plained variance, BART starts by fitting an initial sum-of-trees model, and then  
70 uses Bayesian backfitting with an MCMC algorithm to create a posterior draw.  
71 The Bayesian component of BART is designed to have minimal user input, making  
72 it an unusually out-of-the-box algorithm as Bayesian SDM methods go. The priors  
73 set for covariates and for the distribution of splitting rules are both uniform by  
74 default. (Chipman *et al.*, 2010) The remaining priors, which govern tree depth and  
75 the error distribution, are given a set of default hyperparameters that are robust  
76 enough for the developers of the method to have recommended automated tuning.  
77 The number of trees is the main free parameter; a default of 200 is recommended,  
78 though cross-validation can be used to tune this very easily.

## 79 **3 SDMs with BARTs**

### 80 **3.1 Using dbarts and embarcadero**

81 At least four R packages currently exist that can implement BARTs: `BayesTree`  
82 (Chipman & McCulloch, 2016), `bartMachine` (Kapelner & Bleich, 2013), `BART`  
83 (McCulloch *et al.*, 2018), and `dbarts` (Chipman *et al.*, 2014). Their functionality  
84 differs in important ways, and not all of them are currently capable of important  
85 features like partial dependence plots that are important for SDMs. Our package  
86 is an SDM-oriented workflow wrapper for `dbarts`, which includes most of the  
87 basic functionality needed for species distribution modeling: BART models with  
88 binary response variables, multithread model training, easy generation of partial  
89 dependence surfaces (including two-predictor plots and spatial projections), and  
90 simple prediction including full posteriors. Compared to other packages, `dbarts`  
91 only has one major limitation. In future versions, we hope to make `embarcadero`  
92 flexible for work with any underlying engine.

### 93 **3.2 Variable selection**

94 Variable importance can be measured in BART models by counting the number  
95 of times a given variable is used by a tree split across the full posterior draw of  
96 trees. (This is similar to variable importance in BRTs, which is calculated from

97 the number of tree splits and the corresponding improvement they cause in the  
98 model.) Because the trees are weak learners, in models with higher numbers of  
99 trees, the difference in variable importance becomes less pronounced, and less in-  
100 formative variables become more commonly represented. Consequently, variable  
101 selection can be performed by observing variable importance in models with pro-  
102 gressively fewer trees, and selecting variables that have improved performance in  
103 progressively smaller ensembles. (Chipman *et al.*, 2010) In our package, variable  
104 importance can be calculated with `varimp`, and variable selection diagnostic plots  
105 can be generated with `varimp.plot`.

106 As a way to standardize inclusion rules across workflows, we implemented an  
107 automatic variable elimination procedure in `variable.step`, which (1) fits a full  
108 model with all predictors and a small tree ensemble (default  $m = 10$ ), a fixed  
109 number of times ( $n = 50$ ); (2) eliminates the least informative variable across all  
110 50 runs; (3) re-runs the models again ( $n = 50$ ), recording the root mean square  
111 error; (4) repeats steps 2 and 3 until there are only three covariates left; and (5)  
112 finally selects the model with the lowest average RMSE is selected. The variable  
113 sets recommended by this procedure are almost always nearly identical to the sets  
114 generated from a subjective reading of the diagnostic plots.

115 We recommend careful analysis of all diagnostic information, but include a  
116 full automated variable selection pipeline in `bart.var`, which (a) produces the  
117 initial multi- $m$  diagnostic plot, (b) runs automated variable selection, (c) returns  
118 a model trained with the optimal variable set, (d) plots variable importance in the  
119 final model, and (e) calculates the AUC of the final model. Despite automation,  
120 this procedure is not a fail-safe against the inclusion of uninformative predictors,  
121 or false inference on them; this is true of almost all methods, and predictors  
122 should always be chosen based on at least some expert opinion about biological  
123 plausibility. (Fourcade *et al.*, 2018) Similarly, validation of partial dependence  
124 curves against biological knowledge should be treated as an additional level of  
125 model validation, potentially more informative than measuring predictive accuracy.  
126 (Warren *et al.*, 2019)

### 127 3.3 Visualizing model results

128 BART model predictions can be visualized several ways using `embarcadero`. Un-  
129 fortunately `dbarts::bart.predict` cannot handle spatial data in its native for-  
130 mat. For spatial prediction, we provide `bart.map` as a wrapper, which can also

131 pull the 5% and 95% credible interval layers from the posterior distribution. These  
132 raster layers can be exported to other spatial data packages in R, or external soft-  
133 ware like ArcGIS or QGIS, for more professional visualization.

134 We include several methods for generating partial dependence plots. The func-  
135 tion `partial` is written as a wrapper for `dbarts::pdbart`, and can be used to  
136 generate partial dependence plots with a customizable aesthetic, including multi-  
137 ple ways of visualizing uncertainty. (As with overall predictions, credible intervals  
138 on partial plots are true Bayesian credible intervals.) Two-dimensional partial de-  
139 pendence plots (interactions among two predictor variables) can also be generated  
140 using `dbarts::pd2bart`. Finally, we designed a new visualization called *spatial*  
141 *partial dependence plots*, which reclassify predictor rasters based on their partial  
142 dependence plots, and show the relative suitability of different regions for an in-  
143 dividual covariate. The `spartial` function can be used to generate these maps,  
144 and answer questions like “What desert regions are too arid, even in their wettest  
145 month, for spadefoot toads?” or “Where are the soils with the best pH for redwood  
146 growth?” We illustrate some of these visualization options in Figure 1.

### 147 3.4 Notes on model performance

148 The strength of a given SDM method is very rarely resolved in a single study, and is  
149 challenging to understand in the context of “real world” datasets. Simulation stud-  
150 ies have become common practice as a way to unpack model performance relative  
151 to confounding factors, such as sample size and bias, pseudoabsence design, and  
152 colinearity among predictors; each of these is usually worth testing in isolation.  
153 Moreover, the definition of “performance” is subjective, and SDMs are used for  
154 several (sometimes conflicting) purposes in ecology (Guillera-Arroita *et al.*, 2015);  
155 for example, methods that usually perform well in overall accuracy may not nec-  
156 essarily handle variable importance well. (Smith & Santos, 2019) Ultimately, the  
157 most comprehensive “bake-off” studies, with dozens of methods tested by dozens  
158 of authors, have usually found that more recent and popular methods like MaxEnt  
159 or BRTs are more sensitive to poor calibration than they are discrepant with each  
160 other. (Norberg *et al.*, 2019)

161 In this descriptor, we did not compare the performance of BARTs to other  
162 methods using AUC or comparable accuracy metrics, because our aim was not  
163 to produce a method that universally outperforms `gbm` or more distantly related  
164 methods. Instead, we aimed to produce an accessible environment for explor-

165 ing BARTs, and to propose their use for SDMs as an approach with different  
166 conceptual strengths than existing methods. BART is a nice compromise be-  
167 tween Bayesian prediction—which works well in SDM, but has yet to become  
168 widely popular—and the conceptual familiarity and strengths of regression tree  
169 approaches like BRTs. Some other Bayesian methods for SDMs have been pro-  
170 posed, but are not widely adopted (Golding & Purse, 2016; Redding *et al.*, 2017),  
171 possibly due to the dominance of more familiar model families. Most importantly,  
172 BARTs handle uncertainty with formal Bayesian logic, and generate a posterior  
173 from a single model implementation. We argue this is more coherent than how  
174 uncertainty is usually generated for BRTs, with several hundred BRTs trained  
175 as a usually-unweighted ensemble on randomly-subsetted training data. This in-  
176 herently reduces the training sample size and amplifies within-sample biases (es-  
177 pecially geographic biases) fed into every submodel, and produces a “confidence  
178 interval” that lacks a formal statistical definition as such. We believe the structure  
179 of BART makes it easier to include uncertainty in applied tasks using SDMs, like  
180 estimating the population at risk from a given pathogen.

## 181 4 Example: Crimean-Congo Haemorrhagic Fever

182 Crimean-Congo haemorrhagic fever virus (CCHFV) is a tick-borne Bunyavirus  
183 that causes extremely severe, and often fatal, illness in humans. Very little is  
184 known about CCHFV, compared to other cosmopolitan tick-borne illnesses like  
185 Lyme disease or tularemia. The definitive reservoir of CCHFV is unknown but  
186 likely ungulates (Babayan *et al.*, 2018); outbreaks frequently affect sheep and other  
187 domestic ruminants, and other members of the Nairoviridae infect similar hosts.  
188 The vectors of CCHFV are better known, and are presumed to almost always be  
189 *Hyalomma* ticks, which are widespread throughout Africa and Eurasia; other tick  
190 vectors have been suspected, but evidence for their competence is limited. (Papa  
191 *et al.*, 2017) In Africa, *Hyalomma truncatum* in particular is common throughout  
192 rangeland and is one of the strongest candidates for a primary vector. (Logan  
193 *et al.*, 1989; Wilson *et al.*, 1991)

194 A global map of Crimean-Congo haemorrhagic fever has been previously been  
195 produced with boosted regression trees; a significant amount of the Black Sea  
196 region was suitable, while areas outside had highly localized predictions of suit-  
197 ability, presumably because of data sparsity in Africa especially. (Messina *et al.*,

2015b) However, some major areas of presence appeared under-predicted, such as  
the western Congo Basin. To demonstrate the use of BARTs, we re-mapped trans-  
mission risk in Africa using the same original CCHF occurrence dataset (Messina  
*et al.*, 2015a). Just as studies of dengue have included suitability for *Aedes aegypti*  
as a covariate, our model included a suitability layer for *Hyalomma truncatum*,  
which we created using the canonical dataset on African tick distributions. (Cum-  
ming, 1998); all code for these models and their visualization is available as a  
detailed 30-page vignette with the package.

Both the *Hyalomma* model and the CCHF model were also run with 11 envi-  
ronmental covariates: eight average and monthly variables from WorldClim (BIO  
1, 2, 5, 6, and 12–15; Hijmans *et al.* 2005), layers for mean and amplitude of  
NDVI previously used to map anthrax (Carlson *et al.*, 2019), and a layer of per-  
centage cropland. (Ramankutty *et al.*, 2010) For both models we ran a BART  
with default `dbarts` settings using the full variable set. We then ran automated  
variable set reduction, made spatial predictions using the recommended variables,  
and recorded the accuracy (*Hyalomma*: AUC = 0.911; CCHF: AUC = 0.898).  
Our final model of Crimean-Congo risk included six variables: *H. truncatum* suit-  
ability, mean and amplitude of NDVI, mean annual precipitation (BIO12), and  
precipitation of wettest month (BIO13). The variable importance diagnostic for  
the CCHF model is shown in Figure 2.

Our model predicts that the distribution of CCHF may be more geographically  
expansive than previous studies have indicated (Figure 3). Areas of the highest  
risk are still heavily concentrated in Sahel rangeland and east African highlands,  
but also far more extensive in southern Africa and along the Atlantic coast than  
previously believed. Although *H. truncatum* had a high importance in the final  
model, and scaled positively with CCHF risk, our model still predicted some areas  
outside of its range. In particular, our final CCHF map captured an area in  
Gabon and the western Congo basin where occurrences have been recorded but *H.*  
*truncatum* is likely absent, and another vector may be involved. This may raise  
some interesting questions for future research.

## 5 Next steps

The `embarcadero` package is designed as a beginning framework for using BART  
as a species distribution modeling method. Currently, `embarcadero` version 1.0.1

231 is available open source on Github, at [github.com/cjcarlson/embarcadero](https://github.com/cjcarlson/embarcadero) and soon  
232 it will be available on CRAN. We hope to continue to expand the package based  
233 on user input and collaborative coding. The top priority for development is faster  
234 (multithread) prediction, which remains computationally limiting for global map-  
235 ping projects.

## 236 **Acknowledgements**

237 Thanks to Shweta Bansal and Jason Blackburn for research support, to Ethan Bea-  
238 man for telling me about BARTs in the first place, to Zack Susswein for helpful  
239 comments on design of Bayesian models, and to Tad Dallas for helpful comments.  
240 This work was supported with a Georgetown Environment Initiative (GEI) post-  
241 doctoral fellowship.



## Figures

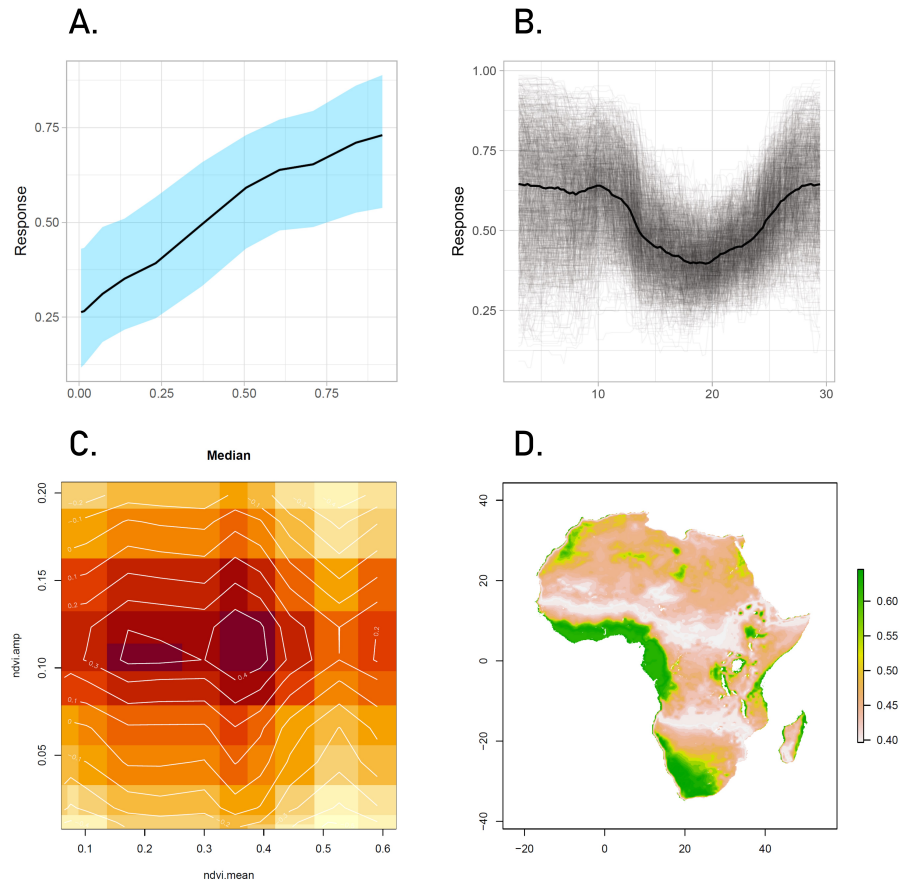

Figure 1: Partial dependence plots from the CCHF model (see Section 4), as examples of four different model visualization styles. (A) Partial dependence plot for *Hyalomma truncatum* suitability, blue bars show 95% posterior CI; (B) partial plot for BIO2 (mean diurnal range), where individual traces show every posterior draw; (c) a two-predictor partial plot for mean and amplitude of NDVI; and (d) a “spatial” plot for BIO12 (annual precipitation).

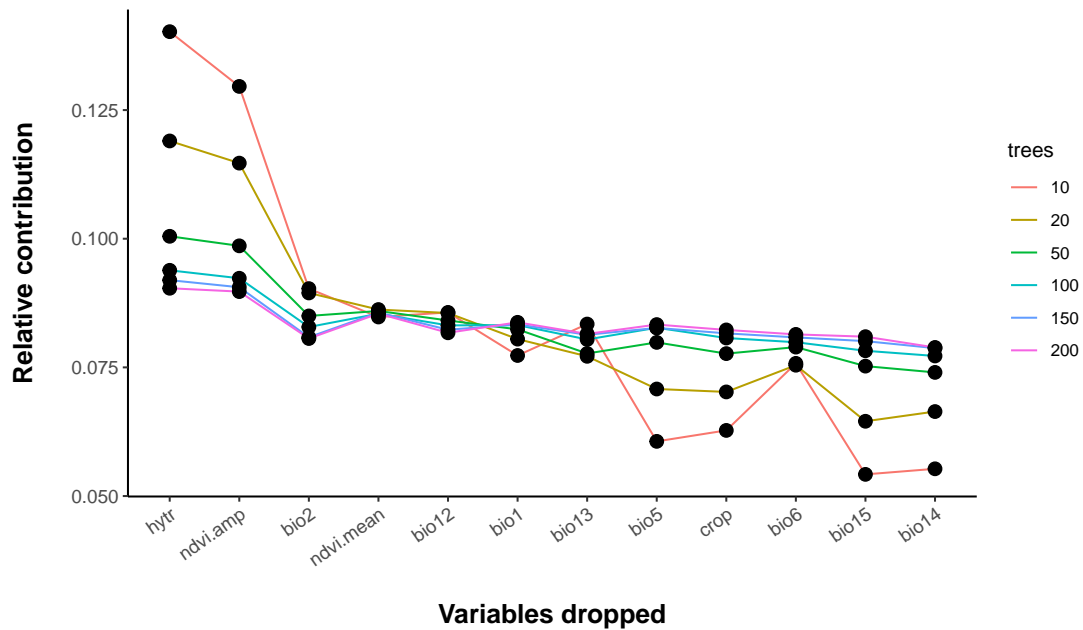

Figure 2: The variable selection diagnostic plot for the CCHF model, in the style of Chipman *et al.* (2010). Variables that are included more often in decision splits (the relative contribution) as the number of trees becomes smaller are more likely to be influential, real predictors. Variables that have increasing contributions as the number of trees increases, on the other hand, should be dropped.

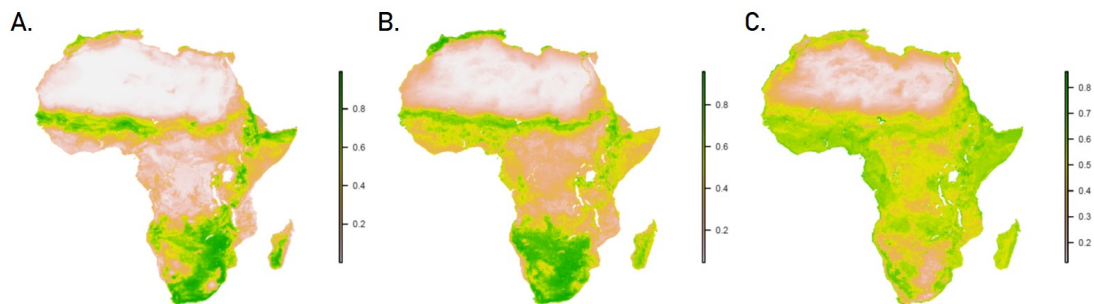

Figure 3: (A) Final posterior mean map of suitability for *Hyalomma truncatum*. (B) Final posterior mean map of suitability for Crimean-Congo haemorrhagic fever virus. (C) The 95% posterior credible interval width for the CCHF model.

## References

243

244 Babayan, S.A., Orton, R.J. & Streicker, D.G. (2018) Predicting reservoir hosts and  
245 arthropod vectors from evolutionary signatures in RNA virus genomes. *Science*,  
246 **362**, 577–580.

247 Bhatt, S., Gething, P.W., Brady, O.J., Messina, J.P., Farlow, A.W., Moyes, C.L.,  
248 Drake, J.M., Brownstein, J.S., Hoen, A.G., Sankoh, O. *et al.* (2013) The global  
249 distribution and burden of dengue. *Nature*, **496**, 504.

250 Carlson, C.J., Kracalik, I.T., Ross, N., Alexander, K.A., Hugh-Jones, M.E., Fegan,  
251 M., Elkin, B.T., Epp, T., Shury, T.K., Zhang, W. *et al.* (2019) The global dis-  
252 tribution of *Bacillus anthracis* and associated anthrax risk to humans, livestock  
253 and wildlife. *Nature Microbiology*, p. 1.

254 Chipman, H., McCulloch, R. & Dorie, V. (2014) dbarts: Discrete Bayesian Addi-  
255 tive Regression Trees Sampler. R package version 0.8-5.

256 Chipman, H. & McCulloch, R. (2016) BayesTree: Bayesian Additive Regression  
257 Trees. R package version 0.3-1.3.

258 Chipman, H.A., George, E.I., McCulloch, R.E. *et al.* (2010) BART: Bayesian ad-  
259 ditive regression trees. *The Annals of Applied Statistics*, **4**, 266–298.

260 Cumming, G. (1998) Host preference in African ticks (Acari: Ixodida): a quanti-  
261 tative data set. *Bulletin of Entomological Research*, **88**, 379–406.

262 Elith, J., Leathwick, J.R. & Hastie, T. (2008) A working guide to boosted regres-  
263 sion trees. *Journal of Animal Ecology*, **77**, 802–813.

264 Farley, S.S. (2017) *A General Framework for Predicting the Optimal Computing*  
265 *Configurations for Climate-driven Ecological Forecasting Models*. Ph.D. thesis.

266 Fourcade, Y., Besnard, A.G. & Secondi, J. (2018) Paintings predict the distribution  
267 of species, or the challenge of selecting environmental predictors and evaluation  
268 statistics. *Global Ecology and Biogeography*, **27**, 245–256.

269 Golding, N. & Purse, B.V. (2016) Fast and flexible Bayesian species distribution  
270 modelling using Gaussian processes. *Methods in Ecology and Evolution*, **7**, 598–  
271 608.

- 272 Guillerá-Arroita, G., Lahoz-Monfort, J.J., Elith, J., Gordon, A., Kujala, H.,  
273 Lentini, P.E., McCarthy, M.A., Tingley, R. & Wintle, B.A. (2015) Is my species  
274 distribution model fit for purpose? Matching data and models to applications.  
275 *Global Ecology and Biogeography*, **24**, 276–292.
- 276 Hijmans, R.J., Cameron, S.E., Parra, J.L., Jones, P.G. & Jarvis, A. (2005) Very  
277 high resolution interpolated climate surfaces for global land areas. *International*  
278 *Journal of Climatology: A Journal of the Royal Meteorological Society*, **25**, 1965–  
279 1978.
- 280 Kapelner, A. & Bleich, J. (2013) bartMachine: Machine learning with Bayesian  
281 additive regression trees. *arXiv preprint arXiv:13122171*.
- 282 Logan, T.M., Linthicum, K.J., Bailey, C.L., Watts, D.M. & Moulton, J.R.  
283 (1989) Experimental transmission of Crimean-Congo hemorrhagic fever virus  
284 by *Hyalomma truncatum* Koch. *The American Journal of Tropical Medicine*  
285 *and Hygiene*, **40**, 207–212.
- 286 McCulloch, R., Sparapani, R., Gramacy, R., Spanbauer, C. & Pratola, M. (2018)  
287 BART: Bayesian additive regression trees. R package version 1.0.
- 288 Messina, J.P., Kraemer, M.U., Brady, O.J., Pigott, D.M., Shearer, F.M., Weiss,  
289 D.J., Golding, N., Ruktanonchai, C.W., Gething, P.W., Cohn, E. *et al.* (2016)  
290 Mapping global environmental suitability for Zika virus. *eLife*, **5**, e15272.
- 291 Messina, J.P., Pigott, D.M., Duda, K.A., Brownstein, J.S., Myers, M.F., George,  
292 D.B. & Hay, S.I. (2015a) A global compendium of human Crimean-Congo haem-  
293 orrhagic fever virus occurrence. *Scientific Data*, **2**, 150016.
- 294 Messina, J.P., Pigott, D.M., Golding, N., Duda, K.A., Brownstein, J.S., Weiss,  
295 D.J., Gibson, H., Robinson, T.P., Gilbert, M., William Wint, G. *et al.* (2015b)  
296 The global distribution of Crimean-Congo hemorrhagic fever. *Transactions of*  
297 *the Royal Society of Tropical Medicine and Hygiene*, **109**, 503–513.
- 298 Norberg, A., Abrego, N., Blanchet, F.G., Adler, F.R., Anderson, B.J., Anttila, J.,  
299 Araújo, M.B., Dallas, T., Dunson, D., Elith, J. *et al.* (2019) A comprehensive  
300 evaluation of predictive performance of 33 species distribution models at species  
301 and community levels. *Ecological Monographs*, p. e01370.

- 302 Papa, A., Tsergouli, K., Tsioka, K. & Mirazimi, A. (2017) Crimean-congo hem-  
303 orrhagic fever: tick-host-virus interactions. *Frontiers in Cellular and Infection*  
304 *Microbiology*, **7**, 213.
- 305 Pigott, D.M., Golding, N., Mylne, A., Huang, Z., Henry, A.J., Weiss, D.J., Brady,  
306 O.J., Kraemer, M.U., Smith, D.L., Moyes, C.L. *et al.* (2014) Mapping the  
307 zoonotic niche of Ebola virus disease in Africa. *eLife*, **3**, e04395.
- 308 Ramankutty, N., Evan, A., Monfreda, C. & Foley, J. (2010) Global agri-  
309 cultural lands: Croplands, 2000. *Data distributed by the Socioeco-*  
310 *nomical Data and Applications Center (SEDAC) [online]: <http://sedac.ciesin.columbia.edu/data/set/aglands-croplands-2000> (Accessed on 1 January 2019).*
- 312 Redding, D.W., Lucas, T.C., Blackburn, T.M. & Jones, K.E. (2017) Evaluating  
313 Bayesian spatial methods for modelling species distributions with clumped and  
314 restricted occurrence data. *PloS One*, **12**, e0187602.
- 315 Smith, A.B. & Santos, M.J. (2019) Testing the ability of species distribution models  
316 to infer variable importance. *bioRxiv*, p. 715904.
- 317 Sparapani, R., Dabbouseh, N., Gutterman, D., Zhang, J., Chen, H., Bluemke, D.,  
318 Lima, J., Burke, G. & Soliman, E. (2018) Novel electrocardiographic criteria  
319 for the diagnosis of left ventricular hypertrophy derived with Bayesian additive  
320 regression trees: the multi-ethnic study of atherosclerosis. *Circulation*, **138**,  
321 A10908–A10908.
- 322 Tan, Y.V., Flannagan, C.A. & Elliott, M.R. (2018) Predicting human-driving  
323 behavior to help driverless vehicles drive: random intercept Bayesian additive  
324 regression trees. *Statistics and Its Interface*, **11**, 557–572.
- 325 VanDerWal, J., Murphy, H.T., Kutt, A.S., Perkins, G.C., Bateman, B.L., Perry,  
326 J.J. & Reside, A.E. (2013) Focus on poleward shifts in species' distribution  
327 underestimates the fingerprint of climate change. *Nature Climate Change*, **3**,  
328 239.
- 329 Warren, D.L., Matzke, N.J. & Iglesias, T.L. (2019) Evaluating species distribution  
330 models with discrimination accuracy is uninformative for many applications.  
331 *BioRxiv*, p. 684399.

- 332 Warren, R., VanDerWal, J., Price, J., Welbergen, J.A., Atkinson, I., Ramirez-  
333 Villegas, J., Osborn, T.J., Jarvis, A., Shoo, L.P., Williams, S.E. *et al.* (2013)  
334 Quantifying the benefit of early climate change mitigation in avoiding biodiver-  
335 sity loss. *Nature Climate Change*, **3**, 678.
- 336 Wilson, M., Gonzalez, J.P., Cornet, J.P. & Camicas, J.L. (1991) Transmission of  
337 Crimean-Congo haemorrhagic fever virus from experimentally infected sheep to  
338 *Hyalomma truncatum* ticks. *Research in Virology*, **142**, 395–404.
- 339 Yen, J.D., Thomson, J.R., Vesk, P.A. & Mac Nally, R. (2011) To what are wood-  
340 land birds responding? Inference on relative importance of in-site habitat vari-  
341 ables using several ensemble habitat modelling techniques. *Ecography*, **34**, 946–  
342 954.
