1 **embarcadero:**  
2 Species distribution modelling with Bayesian additive  
3 regression trees in R

4 Colin J. Carlson<sup>1,†</sup>

5 <sup>1</sup>*Department of Biology, Georgetown University, Washington, D.C. 20057, USA.*

6 <sup>†</sup>*Correspondence should be directed to [cjc322@georgetown.edu](mailto:cjc322@georgetown.edu).*

7 Submitted to *Methods in Ecology and Evolution* on December 26, 2019

8 **Abstract**

9 1. **embarcadero** is an R package of convenience tools for species distribution mod-  
10 elling with Bayesian additive regression trees (BART), a powerful machine learning  
11 approach that has been rarely applied to ecological problems.

12  
13 2. Like other classification and regression tree methods, BART estimates the prob-  
14 ability of a binary outcome based on a set of decision trees. Unlike other methods,  
15 BART iteratively generates sets of trees based on a set of priors about tree structure  
16 and nodes, and builds a posterior distribution of estimated classification probabili-  
17 ties. So far, BARTs have yet to be applied to species distribution modelling.

18  
19 3. **embarcadero** is a workflow wrapper for BART species distribution models, and  
20 includes functionality for easy spatial prediction, an automated variable selection  
21 procedure, several types of partial dependence visualization, and other tools for eco-  
22 logical application. The **embarcadero** package is available open source on Github  
23 and intended for eventual CRAN release.

24  
25 4. To show how **embarcadero** can be used by ecologists, I illustrate a BART workflow  
26 for a virtual species distribution model. The supplement includes a more advanced  
27 vignette showing how BART can be used for mapping disease transmission risk,  
28 using the example of Crimean-Congo haemorrhagic fever in Africa.

29  
30 **Keywords:** Bayesian additive regression trees, species distribution modelling, eco-  
31 logical niche modelling, Crimean-Congo haemorrhagic fever

## 32 1 Introduction

33 In the last two decades, over two dozen statistical and machine learning methods have  
34 been proposed for species distribution modelling (SDM) (Norberg *et al.*, 2019). Over  
35 time, a handful of methods have risen to predominance due to ease of implementation,  
36 computational speed, and strong predictive performance in rigorous cross-validation.  
37 Some methods are especially popular for specific applications, mostly because of disci-  
38 plinary tradition. For example, maximum entropy (MaxEnt) models are widely popular  
39 for studies of global ecological responses to climate change (VanDerWal *et al.*, 2013;  
40 Warren *et al.*, 2013). In disease ecology, boosted regression trees (BRTs) have become  
41 the dominant tool for mapping vectors, reservoirs, and transmission risk of infectious  
42 zoonoses and vector-borne diseases (Carlson *et al.*, 2019; Pigott *et al.*, 2014; Messina  
43 *et al.*, 2016), largely due to an influential 2013 paper on dengue virus (Bhatt *et al.*,  
44 2013). SDMs are used for several—sometimes conflicting—purposes in ecology, and pop-  
45 ular methods are sometimes used despite known shortcomings (Guillera-Arroita *et al.*,  
46 2015; Smith & Santos, 2019). In particular, most popular methods have a limited frame-  
47 work for handling uncertainty, and conspicuously few popular methods are Bayesian (and  
48 vice versa).

49 In this paper, I discuss a new Bayesian approach to classification and regression  
50 trees (CART), one of the most popular families of machine learning methods used in  
51 ecology. Models in this family estimate the probability of a given output variable (in this  
52 case, a binary classification of habitat suitability or species presence) based on decision  
53 “trees” that split predictor variables with nested, binary rule-sets. The precise rules  
54 for generating these trees vary across implementations. For example, in *random forest*  
55 models, an ensemble of trees is generated, where each tree is independently generated  
56 based on a bootstrap of the original dataset; trees grow to the maximum possible depth  
57 (the longest chain of splitting rules), with no pruning (trees are never *post hoc* reduced).  
58 In the *boosted regression trees* approach (BRT), shallower trees with a constrained depth  
59 (“weak learners”) are constructed iteratively that explain the residuals left by previous  
60 trees; this adds bias, but allows the model to focus on unusual cases at the potential  
61 expense of overfitting (Elith *et al.*, 2008; Vezhnevets & Barinova, 2007). CART methods  
62 have many strengths for species distribution modelling; they consistently perform well  
63 in model comparisons (Elith *et al.*, 2006; Mainali *et al.*, 2015; Redding *et al.*, 2017; Wisz  
64 *et al.*, 2008), and the tree-based approach is often more intuitive than the complex fitting  
65 procedures “under the hood” of MaxEnt or Maxlike methods (Elith *et al.*, 2011; Merow  
66 *et al.*, 2013; Merow & Silander, 2014).

67 *Bayesian additive regression trees* (BART) are an exciting and new alternative to  
68 other popular classification tree methods. As in other approaches, BART generates a set

69 of decision trees that explain different components of variance in the outcome variable.  
70 Unlike random forests or boosted regression trees, the formulation of BART is Bayesian,  
71 with the posterior probability of a model shaped by priors  $P(\text{trees})$  on how trees should  
72 look (i.e., the parameters used to generate those trees):

$$P(\text{trees}|\text{data}) \propto P(\text{data}|\text{trees})P(\text{trees}) \quad (1)$$

73 Like boosted regression trees, BART introduces variance by fitting a set of many shallow  
74 “weak learner” trees, but unlike BRT, this is explicitly controlled by three prior distribu-  
75 tions: the probability a tree stops at a node of a given depth, the probability of a given  
76 variable being drawn for a splitting rule, and the probability of splitting that variable at  
77 a particular value. The latter two are usually treated as uniformly distributed (splits are  
78 randomly constructed by variable, and within each variables’ range), while the first is  
79 usually specified as a negative power law, constraining tree depth and penalizing overfit-  
80 ting. Using these priors, a specified number of trees  $m$  are generated with no splits, and  
81 then updated randomly in an MCMC process that allows them to be expanded, rear-  
82 ranged, or pruned. Each model instance is a *sum-of-trees* model, unlike random forests,  
83 which average predictions across trees; to create the sum-of-trees model, each tree is ad-  
84 justed to the residuals of the sum-of-remaining-trees. This process superficially resembles  
85 how boosting works within boosted regression trees, but because trees are tuned to the  
86 ensemble, they rarely overfit to particular cases within the residuals. (Chipman *et al.*,  
87 2010) After dropping a burn-in period, the full set of sum-of-trees models from different  
88 points in the Markov chain is treated as a posterior distribution, and used to generate  
89 the posterior distribution of predictions. (For a more in-depth explanation, including a  
90 visualization of tree structure in the MCMC process, see Tan & Roy (2019).)

91 In computer science, BARTs are used for everything from medical diagnostics to self-  
92 driving car algorithms (Sparapani *et al.*, 2018; Tan *et al.*, 2018); however, they have  
93 yet to find any widespread application in ecology. A study from 2011 used BART as  
94 a tool to examine habitat selection data on birds (Yen *et al.*, 2011); a 2017 study used  
95 BART to evaluate performance data of other species distribution modelling methods  
96 (Farley, 2017). But so far, they have not been used for the purpose of predicting species  
97 distributions. This reflects a broader deficit of Bayesian models in the SDM literature:  
98 several elegant Bayesian SDM methods have been previously proposed (Golding & Purse,  
99 2016; Redding *et al.*, 2017), but none are particularly widely adopted, possibly because  
100 advanced Bayesian models may seem discouraging or unintuitive.

101 BART brings the conceptual familiarity and strengths of classification tree meth-  
102 ods, but adds a relatively simple Bayesian component that inherently and intuitively  
103 handles model uncertainty. This might make it a promising alternative not just to ex-

104 isting Bayesian approaches but also popular classification tree methods, in particular  
105 boosted regression trees. BRT has several easy to use out-of-the-box implementations,  
106 is powerful for ecological inference, and consistently performs well in rigorous tests of  
107 SDM performance. However, BRT also has downsides: it can be prone to overfitting,  
108 and fitting procedures are largely handed down as anecdotal best practices, with many  
109 studies choosing hyperparameters based on software defaults; very few studies select pa-  
110 rameters from formal cross-validation as early work recommended (Elith *et al.*, 2008).  
111 Furthermore, uncertainty is usually measured by generating an unweighted ensemble of  
112 BRT submodels over subsetted training data, generating a confidence interval from data  
113 permutations (like random forests) rather than formal assumptions about model uncer-  
114 tainty. In contrast, the formal Bayesian structure of BART captures uncertainty within  
115 a single model, which is more coherent and intuitive than how uncertainty is usually  
116 generated in BRT ensembles. BART also shares many of the strengths of BRT, like easy  
117 out-of-the-box implementation and easy visualization of “black box” model components,  
118 and outperforms other CART methods in model comparisons. (Chipman *et al.*, 2010)

119 This paper introduces an R package, `embarcadero`, as a convenience tool for running  
120 SDMs with BARTs. Throughout, I use a simulated “virtual species” (see Appendix 1) to  
121 illustrate the workflow and the major features of the package, including model selection,  
122 visualization, and diagnostics. Because boosted regression trees are the most popular  
123 method of species distribution modelling in medical geography, the supplement includes  
124 a second, more detailed vignette using BART to map Crimean-Congo haemorrhagic fever  
125 (CCHF) in Africa, based on the distribution of the tick *Hyalomma truncatum*, a presumed  
126 vector. This is a more challenging and computationally-intensive implementation, and  
127 takes several hours to run on most machines, but highlights some of the strength of the  
128 approach for applied scientific questions.

## 129 2 SDMs with BARTs

### 130 2.1 Implementing BART with binary classification

131 At least four R packages currently exist that can implement BARTs: `BayesTree` (Chipman  
132 & McCulloch, 2016), `bartMachine` (Kapelner & Bleich, 2013), `BART` (McCulloch *et al.*,  
133 2018), and `dbarts` (Chipman *et al.*, 2014). Their functionality differs in important ways,  
134 and not all of them are currently capable of important features like partial dependence  
135 plots that are important for SDMs. This package is an SDM-oriented workflow wrapper  
136 for `dbarts`, which includes most of the basic functionality needed for species distribution  
137 modelling, including a simple implementation of BART with binary outcomes. A list of  
138 the functions made available in `embarcadero`, versus their counterparts and additional

139 useful functions in `dbarts`, is given in Table 1.

140 In the original notation of Chipman *et al.* (2010), BART consists of tree structures  $T$   
141 and terminal nodes (leaves)  $M$ , as an ensemble  $(T_1, M_1), \dots, (T_n, M_n)$ . Each tree generates  
142 a predictive function  $g(\cdot)$ , with a sum of trees function  $f(\cdot)$  given as

$$f(\cdot) = \sum_{j=1}^m g(\cdot; T_j, M_j) + \epsilon; \quad \epsilon \sim \mathcal{N}(0, \sigma^2) \quad (2)$$

143 A set of posterior draws of  $f^*$ , generated by the MCMC process described above, create  
144 the posterior distribution for  $p(f|y) \equiv p(\text{trees}|\text{data})$ . Given the assumption of normality,  
145 BART handles binary classification problems (like species distribution modelling) using  
146 a logit link, where  $\Phi$  is the standard normal c.d.f. and:

$$f(\cdot) = \Phi \left[ \sum_{j=1}^m g(\cdot; T_j, M_j) \right] \quad (3)$$

147 Binary classification is run by `dbarts::bart` automatically when supplied with a binary  
148 outcome. However, the returned predictions are untransformed back into probabilities,  
149 a problem solved in `embarcadero` with a `predict` wrapper. (This also allows prediction  
150 on raster datasets, a key piece of SDM workflow.)

## 151 2.2 An example of a BART SDM

152 To see how BART works, we can generate a virtual species on a hypothetical landscape  
153 which responds to climate variables X1 through X4, but is uninfluenced by variables  
154 X5 to X8 (see Appendix 1). Like most other SDM methods in R, the BART model  
155 itself is run on a data frame of presence-absence or presence-pseudoabsence points, and  
156 associated environmental covariates. For example, with a `RasterStack` called `climate`  
157 and an occurrence dataset called `occ.df`, the basic workflow is

```
158 library(embarcadero)
159 xnames <- c('x1', 'x2', 'x3', 'x4',
160            'x5', 'x6', 'x7', 'x8')
161 ## Run the BART model
162 sdm <- bart(y.train=occ.df[, 'Observed'],
163            x.train=occ.df[, xnames],
164            keeptrees = TRUE)
165 ## Predict the species distribution
166 map <- predict(sdm, climate)
167 ## Visualize model performance
```

```
168 summary(bart)
```

169 This last line returns a brief model diagnostic including the optimal cutoff for thresh-  
170 olding classifications and some measures of performance, like the area under the receiver-  
171 operator curve (AUC):

```
172 Call: bart occ.df[, xnames] occ.df[, "Observed"] TRUE
173 Predictor list:
174      x1 x2 x3 x4 x5 x6 x7 x8
175 Area under the receiver-operator curve
176      AUC = 0.91
177 Recommended threshold (maximizes true skill statistic)
178      Cutoff = 0.42
179      TSS = 0.71
180      Resulting type I error rate: 0.078
181      Resulting type II error rate: 0.21
```

182 Additionally, `summary` returns a diagnostic figure (**Figure 1**), summarizing the perfor-  
183 mance of the classifier on the training data.

184 The primary appeal of BART, compared to other CART methods, is a formal way of  
185 measuring model uncertainty within any individual implementation. Pulling uncertainty  
186 out of BART predictions is easy with `embarcadero`; for example, to pull a 95% credible  
187 interval, a user can specify:

```
188 map <- predict(sdm, climate, quantiles=c(0.025, 0.975))
```

189 Mapping the difference between these two rasters gives the credible interval width, which  
190 provides a native measure of spatial uncertainty, analogous to how the coefficient of  
191 variation can be used to measure spatial uncertainty across an ensemble of BRT runs  
192 (Carlson *et al.*, 2019). When running tasks especially with several quantiles, or large  
193 rasters, prediction runtime grows quickly and memory can become limiting; `predict()`  
194 has a “`splitby`” option that breaks the task into pieces, which minimizes memory conflicts,  
195 adds a progress bar, and allows estimation of total runtime based on the first chunk:

```
196 map <- predict(sdm, climate, quantiles=c(0.025, 0.975), splitby=10)
```

### 197 3 Variable selection

198 Variable importance (calculated by `varimp()`) is usually measured in BART models  
199 by counting the number of times a given variable is used by a tree split across the

200 full posterior draw of trees. (This is similar to variable importance in BRTs, which  
201 is calculated from the number of tree splits and the corresponding improvement they  
202 cause in the model.) In models with higher numbers of trees, the difference in variable  
203 importance becomes less pronounced, and less informative variables receive a higher  
204 number of splitting rules. Conversely, variable selection can be performed by running  
205 models with a small number of trees ( $m = 10$  or  $20$ ), and observing which variables  
206 stop being included in trees. (Chipman *et al.*, 2010) This diagnostic is generated in  
207 `embarcadero` by `varimp.diag()` (see an example in **Figure 2**).

208 Analysis of this diagnostic plot is still subjective and informal. As a way to stan-  
209 dardize variable set reduction rules across workflows, `embarcadero` includes an automatic  
210 variable selection procedure in `variable.step()`:

- 211 I. Fit a full model with all predictors and a small tree ensemble (default  $m = 10$ ), a  
212 fixed number of times (default  $n = 50$ )
- 213 II. Eliminate the least informative variable across all 50 runs;
- 214 III. Re-run the models again minus the least informative variable ( $n = 50$  times again),  
215 recording the root mean square error (on the training data);
- 216 IV. Repeat steps 2 and 3 until there are only three covariates left;
- 217 V. Finally, select the model with the lowest average root mean square error (RMSE).

218 Anecdotally, this procedure almost always recommends dropping every variable with  
219 decreasing importance in models with fewer trees, and conserves every variable with  
220 increasing importance. In our virtual species case, for example, the diagnostic shows  
221 that X1 through X4 have much higher performance than X5 through X8 (**Figure 2**),  
222 and the automated procedure recommends dropping X5 through X8:

```
223 varimp.diag(occ.df[,xnames],  
224             occ.df[,"Observed"],  
225             iter=50)  
226 step.model <- variable.step(x.data=occ.df[,xnames],  
227                             y.data=occ.df[,"Observed"])  
228 step.model
```

```
229 [1] "x1" "x2" "x3" "x4"
```

230 This largely matches original work which found that BART is highly effective at identi-  
231 fying informative subsets of predictors (see section 5.2.1 of Chipman *et al.*, 2010).

232 I recommend careful analysis of all diagnostic information, but include a full auto-  
233 mated variable selection pipeline in `bart.step`, which (a) produces the initial multi-*m*  
234 diagnostic plot, (b) runs automated variable selection, (c) returns a model trained with  
235 the optimal variable set, (d) plots variable importance in the final model, and (e) returns  
236 the summary of the final model. Despite automation, this procedure is not a fail-safe  
237 against the inclusion of uninformative predictors, or false inference on them; this is true  
238 of almost all methods, and predictors should always be chosen based on at least some  
239 expert opinion about biological plausibility (Fourcade *et al.*, 2018). Similarly, validation  
240 of partial dependence curves against biological knowledge should be treated as an addi-  
241 tional level of model validation, potentially more informative than measuring predictive  
242 accuracy (Warren *et al.*, 2019).

## 243 4 Visualizing model results

244 `embarcadero` includes several methods for generating partial dependence plots. The  
245 function `partial` is written as a wrapper for `dbarts::pdbart`, and can be used to gen-  
246 erate partial dependence plots with a customizable, `ggplot2`-based aesthetic, including  
247 multiple ways of visualizing uncertainty. (As with overall predictions, credible intervals  
248 on partial plots are true Bayesian credible intervals.) Posteriors can be visualized with  
249 traceplots of individual draws, or bars for a credible interval of a specified width (by  
250 default 95%):

```
251 partial(sdm, x.vars=c("x4"),  
252         smooth=5,  
253         equal=TRUE,  
254         trace=FALSE)  
255 ## VERSUS, for comparison,  
256 gbm1 <- dismo::gbm.step(data=occ.df,  
257                        gbm.x = 2:5, gbm.y = 1,  
258                        family = "bernoulli",  
259                        tree.complexity = 5,  
260                        learning.rate = 0.01,  
261                        bag.fraction = 0.5)  
262 dismo::gbm.plot(gbm1, variable.no=4, rug=TRUE,  
263                plot.layout=c(1,1))
```

264 This visualizes uncertainty much clearer than, for example, `dismo::gbm.plot` can in



265 a single instance (**Figure 3**). Two-dimensional partial dependence plots (interactions  
266 among two predictor variables) can also be generated using `dbarts::pd2bart`.

267 Finally, `embarcadero` a new visualization called *spatial partial dependence plots*, which  
268 reclassify predictor rasters based on their partial dependence plots, and show the relative  
269 suitability of different regions for an individual covariate. The `spartial` function can  
270 be used to generate these maps, and answer questions like “What desert regions are too  
271 arid, even in their wettest month, for spadefoot toads?” or “Where are the soils with  
272 the best pH for redwood growth?” These visualization options are illustrated in greater  
273 depth in the advanced vignette.

## 274 5 An advanced vignette

275 To demonstrate applications to disease transmission mapping, the supplement includes an  
276 advanced tutorial on `embarcadero` focused on updating an African risk map for Crimean-  
277 Congo haemorrhagic fever virus (CCHF). CCHF is a tick-borne Bunyavirus that causes  
278 extremely severe, and often fatal, illness in humans. Very little is known about CCHF,  
279 compared to other cosmopolitan tick-borne illnesses like Lyme disease or tularemia. The  
280 definitive reservoir of CCHF is unknown but likely ungulates (Babayán *et al.*, 2018);  
281 outbreaks frequently affect sheep and other domestic ruminants. The vectors of CCHF  
282 are better known, and are presumed to almost always be *Hyalomma* ticks, which are  
283 widespread throughout Africa and Eurasia; other tick vectors have been suspected, but  
284 evidence for their competence is limited. (Papa *et al.*, 2017) In Africa, *Hyalomma trun-*  
285 *catum* in particular is common throughout rangeland and is a strong candidate for a  
286 primary vector. (Logan *et al.*, 1989; Wilson *et al.*, 1991) A global map of Crimean-  
287 Congo haemorrhagic fever has been previously been produced with boosted regression  
288 trees; a significant amount of the Black Sea region was suitable, while areas outside had  
289 highly localized predictions of suitability, presumably because of data sparsity in Africa  
290 especially. (Messina *et al.*, 2015b) However, some major areas of presence appeared  
291 under-predicted, such as the western Congo Basin.

292 The advanced vignette shows how BART can be used to map CCHF in Africa, using  
293 the same occurrence dataset as previous mapping efforts have (Messina *et al.*, 2015a).  
294 Just as studies of dengue risk have included suitability for the *Aedes aegypti* mosquito as  
295 a covariate, the new model includes a suitability layer for *Hyalomma truncatum*, created  
296 from the canonical dataset on African tick distributions. (Cumming, 1998). The updated  
297 map predicts that the distribution of CCHF may be more geographically expansive than  
298 previous studies have indicated (**Figure 4**). Areas of the highest risk are still heavily  
299 concentrated in Sahel rangeland and east African highlands, but also far more extensive  
300 in southern Africa and along the Atlantic coast than previously believed. A detailed

301 tutorial is provided showing this workflow in the Supplementary Materials of this paper,  
302 and all data are available online ([github.com/cjcarlson/pier39](https://github.com/cjcarlson/pier39)).

## 303 6 Discussion

304 Because BART is a comparatively new method, many of the basic use case questions  
305 remain mostly unaddressed: Do pseudoabsences perform notably worse than absences?  
306 Is there a minimum sample size? Does collinearity inflate or distort variable importance?  
307 Users may wish to explore some of these points using virtual species before working with  
308 BART on their data, or to compare BART results to other methods as a sense check.

309 Furthermore, as with any other Bayesian method, out of the box implementation  
310 can make it easy to neglect or underconsider prior selection. More advanced users may  
311 be interested in going more in depth within the BART literature to set better priors.  
312 For example, using a uniform prior on covariate importance can be unhelpful—especially  
313 in high-dimensionality data with only a few valid predictors, where the model tends to  
314 converge on the variable importance prior. (Tan *et al.*, 2018; Rocková & van der Pas,  
315 2017) Instead, setting a Dirichlet distribution for the prior can significantly improve  
316 model performance and variable selection. (Linero, 2018)

317 Finally, it is worth mentioning that BART is a growing topic of interest in ma-  
318 chine learning, and new extensions may expand applications within SDM work and more  
319 broadly in spatial ecology. For example, the random intercept BART (riBART) model is  
320 a framework for handling cases of structure within outcome data; this framework might  
321 be useful for cases where sampling bias has categorical structure (e.g., different levels of  
322 sampling across country or state borders). (Tan *et al.*, 2018) Similarly, causal inference  
323 using the BART framework has become especially popular (Hahn *et al.*, 2017), which  
324 may be an interesting direction for modelling given recent work proposing causal infer-  
325 ence as a new priority for mapping infectious diseases. (Kraemer *et al.*, 2019) Expanding  
326 work along these lines will help establish better best practices for using BARTs in SDM  
327 applications.

## 328 Acknowledgements

329 Thanks to Vincent Dorie for creating the fabulous and wonderfully useful `dbarts` pack-  
330 age, to Shweta Bansal and Jason Blackburn for research support, to Ethan Beaman for  
331 telling me about BARTs in the first place, to Zack Susswein for helpful comments on  
332 design of Bayesian models, to Tad Dallas for helpful comments on the R package and  
333 manuscript, and to David Lawrence Miller and a second anonymous reviewer for detailed  
334 and helpful feedback. This work was funded by a Georgetown Environment Initiative

335 (GEI) postdoctoral fellowship.

## 336 Appendix 1. Generating a virtual species for modelling.

337 For this example, we create a virtual landscape of eight Gaussian “climate variables” on  
338 a 150 by 150 cell grid (with NLMR), create a virtual species inhabiting that landscape but  
339 only depending on four of eight total “climate variables” (with `virtuallandscape`), and  
340 then extract a presence-absence dataset for modelling (with `embarcadero`).

```
341 library(NLMR, quietly = T)
342 library(virtuallandscape, quietly = T)
343 set.seed(12345)
344
345 ## Random landscape
346 onelandscape <- function(x) {NLMR::nlm_gaussianfield(nrow = 150,
347                                                    ncol = 150,
348                                                    rescale = FALSE)}
349 climate <- stack(lapply(c(1:8), onelandscape))
350 names(climate) <- c("x1", "x2", "x3", "x4", "x5", "x6", "x7", "x8")
351
352 ## Generate the species' climatic niche from X1 through X4
353 random.sp <- generateRandomSp(climate[[1:4]],
354                              approach="pca",
355                              relations="gaussian",
356                              species.prevalence=0.5,
357                              realistic.sp = TRUE,
358                              PA.method="threshold")
359
360 ## Generate some presences, and some absences
361 sp.points <- sampleOccurrences(random.sp,
362                               n=250,
363                               type = "presence-absence")
364
365 ## Extract the associated climate values
366 occ <- SpatialPoints(sp.points$sample.points[,c("x", "y")])
367 occ.df <- cbind(sp.points$sample.points,
368               raster::extract(climate, occ))
369
370 ## Finally, let's drop the long-lats and the "Real" presence-absence
371 ## values and just leave behind an "Observed" and the climate data
372 occ.df <- occ.df[,-c(1:3)]
```

373 If we were to run `head(occ.df)` it should return a data frame that looks like this:

```
374 Observed x1      x2      x3      x4      x5      x6      x7      x8
375 1          0 1.9  0.093 -3.935  0.45 -1.90  0.16  4.97 -1.23
376 2          1 1.4 -1.396  1.825 -1.43  2.27 -1.48  1.19  3.96
377 3          0 3.9 -1.202 -0.964  2.15 -2.24  5.85  1.46  5.12
378 4          0 1.7 -1.624 -2.984  2.75  3.08  3.84 -1.93  0.97
379 5          1 2.5  1.362  0.089 -4.69 -0.96  0.28  0.66  2.61
380 6          0 1.4  3.856 -1.720  0.70 -0.54 -2.50 -0.92  6.05
```

381

## Figures and Tables

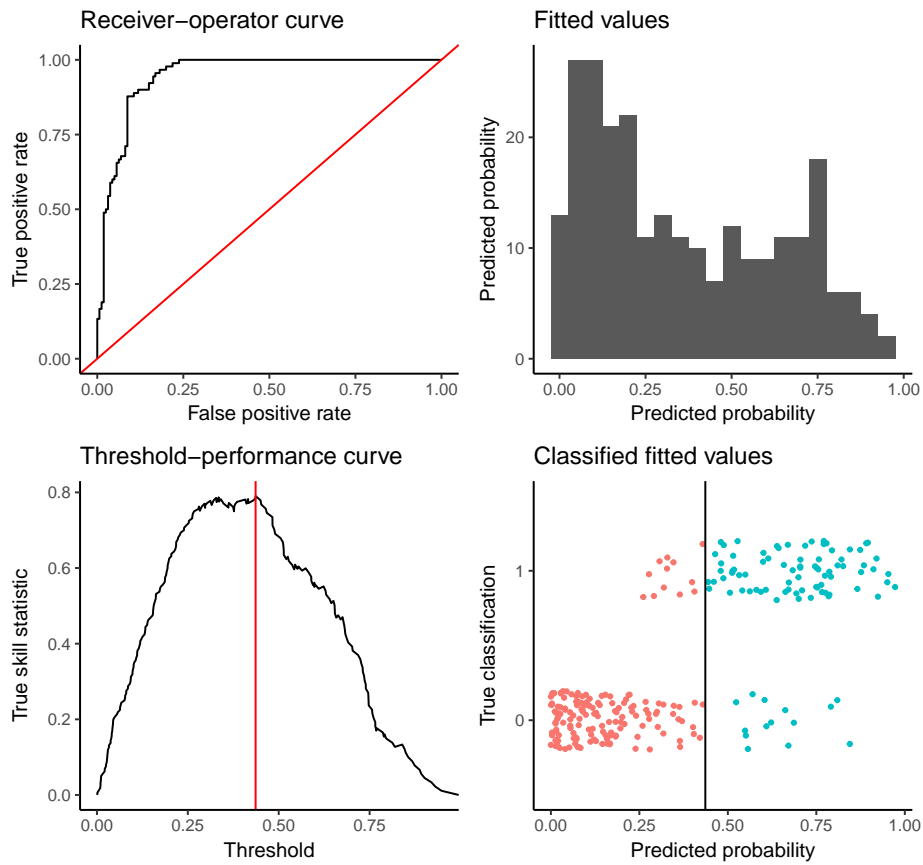

Figure 1: The model diagnostic returned by `summary()`.

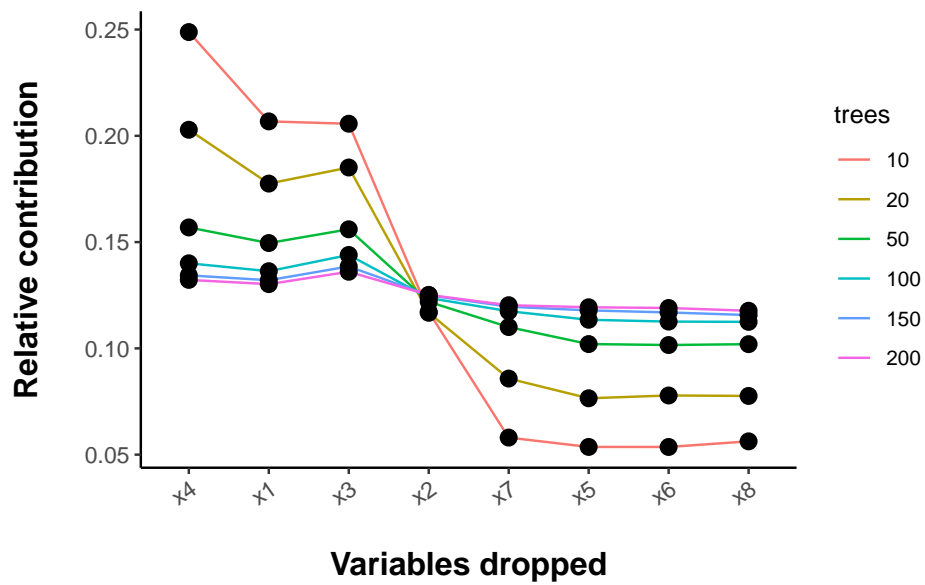

Figure 2: The model diagnostic returned by `varimp.diag()`.

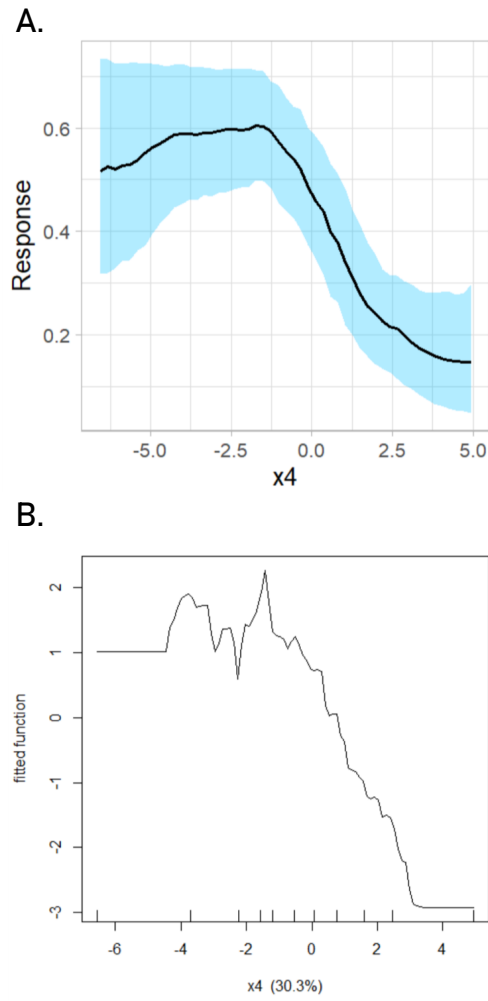

Figure 3: Partial dependence curves generated by single-instance BART implementations (A) show uncertainty with more transparency and clarity than those generated from single-instance BRT implementations (B).



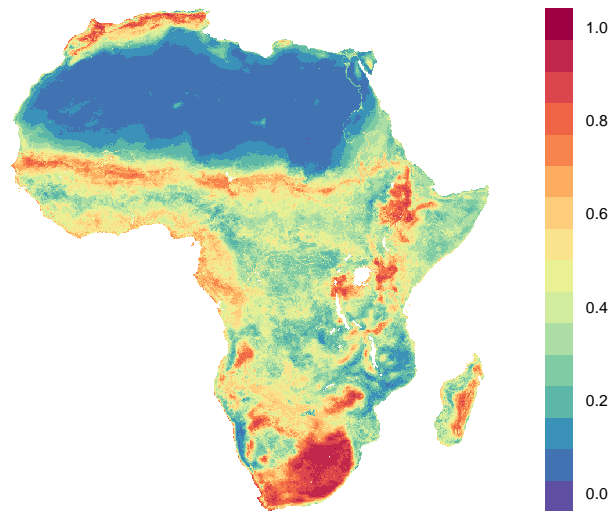

Figure 4: A map of Crimean-Congo haemorrhagic fever transmission risk, constructed using ecological niche modelling with BART (see Supplementary Materials).

| <b>Core modelling functionality</b>            |                                                                                                                                                                                                                                                                                             |
|------------------------------------------------|---------------------------------------------------------------------------------------------------------------------------------------------------------------------------------------------------------------------------------------------------------------------------------------------|
| <code>bart</code> (in <code>dbarts</code> )    | Runs a binary BART classification model.                                                                                                                                                                                                                                                    |
| <code>bart.step</code>                         | Full implementation of a BART model with built-in variable set reduction (a wrapper for <code>dbarts:::bart</code> , <code>variable.step</code> , <code>varimp</code> , <code>varimp.diag</code> , and <code>summary</code> ).                                                              |
| <code>predict</code>                           | Predict species distributions with a BART model and a <code>RasterStack</code> of environmental layers (a wrapper for <code>dbarts:::predict.bart</code> ).                                                                                                                                 |
| <code>summary</code>                           | Returns a summary of call, performance, and diagnostic plots for a BART model object.                                                                                                                                                                                                       |
| <b>Variable diagnostics</b>                    |                                                                                                                                                                                                                                                                                             |
| <code>variable.step</code>                     | Stepwise variable set reduction algorithm.                                                                                                                                                                                                                                                  |
| <code>varimp</code>                            | Returns variable importance, with optional plots.                                                                                                                                                                                                                                           |
| <code>varimp.diag</code>                       | Diagnostic of variable importance at different $m$ values.                                                                                                                                                                                                                                  |
| <b>Visualization</b>                           |                                                                                                                                                                                                                                                                                             |
| <code>partial</code>                           | Partial dependence plots for single variables (a <code>ggplot2</code> -based wrapper for <code>dbarts:::pdbart</code> ).                                                                                                                                                                    |
| <code>pd2bart</code> (in <code>dbarts</code> ) | Two-predictor, three-dimensional partial dependence plots (no wrapper implemented yet).                                                                                                                                                                                                     |
| <code>plot.mcmc</code>                         | Visualize each posterior draw's prediction and the running average of those predictions. Can be used with the <code>animation</code> package to create GIFs of how the posterior draw learns to fit the data (especially interesting for the burn-in of models with small number of trees). |
| <code>spartial</code>                          | Spatial projection (maps) of partial dependence plots onto raw environmental covariates.                                                                                                                                                                                                    |
| <b>Convenience tools</b>                       |                                                                                                                                                                                                                                                                                             |
| <code>bigstack</code>                          | Fast aggregation of an environmental layer <code>RasterStack</code> for quick prediction, using the <code>velox</code> package.                                                                                                                                                             |

Table 1: Functions available in `embarcadero` and additional functions in `dbarts` of importance.

## References

382

- 383 Babayan, S.A., Orton, R.J. & Streicker, D.G. (2018) Predicting reservoir hosts and  
384 arthropod vectors from evolutionary signatures in RNA virus genomes. *Science*, **362**,  
385 577–580.
- 386 Bhatt, S., Gething, P.W., Brady, O.J., Messina, J.P., Farlow, A.W., Moyes, C.L., Drake,  
387 J.M., Brownstein, J.S., Hoen, A.G., Sankoh, O. *et al.* (2013) The global distribution  
388 and burden of dengue. *Nature*, **496**, 504.
- 389 Carlson, C.J., Kracalik, I.T., Ross, N., Alexander, K.A., Hugh-Jones, M.E., Fegan, M.,  
390 Elkin, B.T., Epp, T., Shury, T.K., Zhang, W. *et al.* (2019) The global distribution  
391 of *Bacillus anthracis* and associated anthrax risk to humans, livestock and wildlife.  
392 *Nature Microbiology*, p. 1.
- 393 Chipman, H., McCulloch, R. & Dorie, V. (2014) dbarts: Discrete Bayesian Additive  
394 Regression Trees Sampler. R package version 0.8-5.
- 395 Chipman, H. & McCulloch, R. (2016) BayesTree: Bayesian Additive Regression Trees.  
396 R package version 0.3-1.3.
- 397 Chipman, H.A., George, E.I., McCulloch, R.E. *et al.* (2010) BART: Bayesian additive  
398 regression trees. *The Annals of Applied Statistics*, **4**, 266–298.
- 399 Cumming, G. (1998) Host preference in African ticks (Acari: Ixodida): a quantitative  
400 data set. *Bulletin of Entomological Research*, **88**, 379–406.
- 401 Elith, J., H. Graham, C., P. Anderson, R., Dudík, M., Ferrier, S., Guisan, A., J. Hijmans,  
402 R., Huettmann, F., R. Leathwick, J., Lehmann, A. *et al.* (2006) Novel methods improve  
403 prediction of species' distributions from occurrence data. *Ecography*, **29**, 129–151.
- 404 Elith, J., Leathwick, J.R. & Hastie, T. (2008) A working guide to boosted regression  
405 trees. *Journal of Animal Ecology*, **77**, 802–813.
- 406 Elith, J., Phillips, S.J., Hastie, T., Dudík, M., Chee, Y.E. & Yates, C.J. (2011) A statis-  
407 tical explanation of MaxEnt for ecologists. *Diversity and Distributions*, **17**, 43–57.
- 408 Farley, S.S. (2017) *A General Framework for Predicting the Optimal Computing Config-  
409 urations for Climate-driven Ecological Forecasting Models*. Ph.D. thesis.
- 410 Fourcade, Y., Besnard, A.G. & Secondi, J. (2018) Paintings predict the distribution of  
411 species, or the challenge of selecting environmental predictors and evaluation statistics.  
412 *Global Ecology and Biogeography*, **27**, 245–256.

- 413 Golding, N. & Purse, B.V. (2016) Fast and flexible Bayesian species distribution mod-  
414 elling using Gaussian processes. *Methods in Ecology and Evolution*, **7**, 598–608.
- 415 Guillera-Aroita, G., Lahoz-Monfort, J.J., Elith, J., Gordon, A., Kujala, H., Lentini,  
416 P.E., McCarthy, M.A., Tingley, R. & Wintle, B.A. (2015) Is my species distribution  
417 model fit for purpose? Matching data and models to applications. *Global Ecology and*  
418 *Biogeography*, **24**, 276–292.
- 419 Hahn, P.R., Murray, J.S. & Carvalho, C. (2017) Bayesian regression tree models for  
420 causal inference: regularization, confounding, and heterogeneous effects. *arXiv preprint*  
421 *arXiv:170609523*.
- 422 Kapelner, A. & Bleich, J. (2013) bartMachine: Machine learning with Bayesian additive  
423 regression trees. *arXiv preprint arXiv:13122171*.
- 424 Kraemer, M.U., Reiner Jr, R.C. & Bhatt, S. (2019) Causal inference in spatial mapping.  
425 *Trends in Parasitology*, **35**, 743–746.
- 426 Linero, A.R. (2018) Bayesian regression trees for high-dimensional prediction and variable  
427 selection. *Journal of the American Statistical Association*, **113**, 626–636.
- 428 Logan, T.M., Linthicum, K.J., Bailey, C.L., Watts, D.M. & Moulton, J.R. (1989) Exper-  
429 imental transmission of Crimean-Congo hemorrhagic fever virus by *Hyalomma trun-*  
430 *catum* Koch. *The American Journal of Tropical Medicine and Hygiene*, **40**, 207–212.
- 431 Mainali, K.P., Warren, D.L., Dhileepan, K., McConnachie, A., Strathie, L., Hassan,  
432 G., Karki, D., Shrestha, B.B. & Parmesan, C. (2015) Projecting future expansion  
433 of invasive species: comparing and improving methodologies for species distribution  
434 modeling. *Global Change Biology*, **21**, 4464–4480.
- 435 McCulloch, R., Sparapani, R., Gramacy, R., Spanbauer, C. & Pratola, M. (2018) BART:  
436 Bayesian additive regression trees. R package version 1.0.
- 437 Merow, C. & Silander, J.A. (2014) A comparison of maxlike and maxent for modelling  
438 species distributions. *Methods in Ecology and Evolution*, **5**, 215–225.
- 439 Merow, C., Smith, M.J. & Silander, J.A. (2013) A practical guide to maxent for modeling  
440 species' distributions: what it does, and why inputs and settings matter. *Ecography*,  
441 **36**, 1058–1069.
- 442 Messina, J.P., Kraemer, M.U., Brady, O.J., Pigott, D.M., Shearer, F.M., Weiss, D.J.,  
443 Golding, N., Ruktanonchai, C.W., Gething, P.W., Cohn, E. *et al.* (2016) Mapping  
444 global environmental suitability for Zika virus. *eLife*, **5**, e15272.

- 445 Messina, J.P., Pigott, D.M., Duda, K.A., Brownstein, J.S., Myers, M.F., George, D.B. &  
446 Hay, S.I. (2015a) A global compendium of human Crimean-Congo haemorrhagic fever  
447 virus occurrence. *Scientific Data*, **2**, 150016.
- 448 Messina, J.P., Pigott, D.M., Golding, N., Duda, K.A., Brownstein, J.S., Weiss, D.J.,  
449 Gibson, H., Robinson, T.P., Gilbert, M., William Wint, G. *et al.* (2015b) The global  
450 distribution of Crimean-Congo hemorrhagic fever. *Transactions of the Royal Society  
451 of Tropical Medicine and Hygiene*, **109**, 503–513.
- 452 Norberg, A., Abrego, N., Blanchet, F.G., Adler, F.R., Anderson, B.J., Anttila, J., Araújo,  
453 M.B., Dallas, T., Dunson, D., Elith, J. *et al.* (2019) A comprehensive evaluation of  
454 predictive performance of 33 species distribution models at species and community  
455 levels. *Ecological Monographs*, p. e01370.
- 456 Papa, A., Tsergouli, K., Tsioka, K. & Mirazimi, A. (2017) Crimean-congo hemorrhagic  
457 fever: tick-host-virus interactions. *Frontiers in Cellular and Infection Microbiology*, **7**,  
458 213.
- 459 Pigott, D.M., Golding, N., Mylne, A., Huang, Z., Henry, A.J., Weiss, D.J., Brady, O.J.,  
460 Kraemer, M.U., Smith, D.L., Moyes, C.L. *et al.* (2014) Mapping the zoonotic niche of  
461 Ebola virus disease in Africa. *eLife*, **3**, e04395.
- 462 Redding, D.W., Lucas, T.C., Blackburn, T.M. & Jones, K.E. (2017) Evaluating Bayesian  
463 spatial methods for modelling species distributions with clumped and restricted occur-  
464 rence data. *PloS One*, **12**, e0187602.
- 465 Rocková, V. & van der Pas, S. (2017) Posterior concentration for bayesian regression  
466 trees and forests. *Annals of Statistics (In Revision)*, pp. 1–40.
- 467 Smith, A.B. & Santos, M.J. (2019) Testing the ability of species distribution models to  
468 infer variable importance. *bioRxiv*, p. 715904.
- 469 Sparapani, R., Dabbouseh, N., Gutterman, D., Zhang, J., Chen, H., Bluemke, D., Lima,  
470 J., Burke, G. & Soliman, E. (2018) Novel electrocardiographic criteria for the diagnosis  
471 of left ventricular hypertrophy derived with Bayesian additive regression trees: the  
472 multi-ethnic study of atherosclerosis. *Circulation*, **138**, A10908–A10908.
- 473 Tan, Y.V., Flannagan, C.A. & Elliott, M.R. (2018) Predicting human-driving behavior  
474 to help driverless vehicles drive: random intercept Bayesian additive regression trees.  
475 *Statistics and Its Interface*, **11**, 557–572.
- 476 Tan, Y.V. & Roy, J. (2019) Bayesian additive regression trees and the general bart model.  
477 *arXiv preprint arXiv:190107504*.

- 478 VanDerWal, J., Murphy, H.T., Kutt, A.S., Perkins, G.C., Bateman, B.L., Perry, J.J. &  
479 Reside, A.E. (2013) Focus on poleward shifts in species' distribution underestimates  
480 the fingerprint of climate change. *Nature Climate Change*, **3**, 239.
- 481 Vezhnevets, A. & Barinova, O. (2007) Avoiding boosting overfitting by removing confus-  
482 ing samples. *European Conference on Machine Learning*, pp. 430–441. Springer.
- 483 Warren, D.L., Matzke, N.J. & Iglesias, T.L. (2019) Evaluating species distribution mod-  
484 els with discrimination accuracy is uninformative for many applications. *BioRxiv*, p.  
485 684399.
- 486 Warren, R., VanDerWal, J., Price, J., Welbergen, J.A., Atkinson, I., Ramirez-Villegas,  
487 J., Osborn, T.J., Jarvis, A., Shoo, L.P., Williams, S.E. *et al.* (2013) Quantifying the  
488 benefit of early climate change mitigation in avoiding biodiversity loss. *Nature Climate*  
489 *Change*, **3**, 678.
- 490 Wilson, M., Gonzalez, J.P., Cornet, J.P. & Camicas, J.L. (1991) Transmission of  
491 Crimean-Congo haemorrhagic fever virus from experimentally infected sheep to  
492 *Hyalomma truncatum* ticks. *Research in Virology*, **142**, 395–404.
- 493 Wisz, M.S., Hijmans, R.J., Li, J., Peterson, A.T., Graham, C., Guisan, A. & NCEAS  
494 Predicting Species Distributions Working Group (2008) Effects of sample size on the  
495 performance of species distribution models. *Diversity and Distributions*, **14**, 763–773.
- 496 Yen, J.D., Thomson, J.R., Vesk, P.A. & Mac Nally, R. (2011) To what are woodland  
497 birds responding? Inference on relative importance of in-site habitat variables using  
498 several ensemble habitat modelling techniques. *Ecography*, **34**, 946–954.
